# Supplementary material for: Involvement of aberrantly activated HOTAIR/EZH2/miR-193a feedback loop in progression of prostate cancer
Source: Springer Nature journal article supplement (doi:10.1186/s13046-017-0629-7), 2017-11-15
Supplement: MOESM1 [file 15227162]

**Additional Table S1:MSKCC dataset analysis in MET and PCA tissues**

| <b>Under-expressed<br/>miRNA</b> | <b>Normalized intensity</b> |               | <b><i>P</i>-value</b> |
|----------------------------------|-----------------------------|---------------|-----------------------|
|                                  | <b>MET</b>                  | <b>PCA</b>    | <b>MET/PCA</b>        |
| MiR-193a-3p                      | 7.922 ± 0.273               | 9.082 ± 0.042 | 2.72E-05              |
| MiR-148a                         | 11.05 ± 0.411               | 12.50 ± 0.080 | 3.65E-05              |
| MiR-203                          | 5.460 ± 0.335               | 6.556 ± 0.079 | 8.18E-05              |
| MiR-30c                          | 9.364 ± 0.269               | 10.41 ± 0.054 | 9.80E-05              |
| MiR-19b                          | 11.98 ± 0.392               | 12.59 ± 0.042 | 1.20E-03              |
| MiR-30b                          | 11.10 ± 0.336               | 11.70 ± 0.060 | 3.60E-03              |
| MiR-17                           | 9.762 ± 0.339               | 10.30 ± 0.053 | 5.40E-03              |
| MiR-146a                         | 6.709 ± 0.429               | 7.449 ± 0.101 | 1.95E-02              |

MET : metastatic prostate cancer tissues; PCA : primary prostate cancer tissues.
